# Supplementary material for: Strong interactions and charge transfers between a charged benzene molecule and multilayer graphenes
Source: Royal Society of Chemistry journal article supplement (doi:10.1039/c2jm35634a), 2012-01-01
Supplement: c2jm35634a.pdf [file c2jm35634a.pdf]

**Supporting Information:**

# Strong interactions and charge transfers between a charged benzene molecule and multilayer graphenes

Sonam Wangmo,<sup>a</sup> Ruixia Song,<sup>a</sup> Li Wang,<sup>a</sup> Wuwei Jin,<sup>a, b</sup> Dajun Ding,<sup>a</sup> Zhigang Wang,<sup>\*, a</sup> and Rui-Qin Zhang,<sup>\*, a, c</sup>

<sup>a</sup> Institute of Atomic and Molecular Physics, Jilin University, Changchun, 130012, China

<sup>b</sup> College of Mathematics, Jilin University, Changchun, 130012, China

<sup>c</sup> Department of Physics and Materials Science and Centre for Functional Photonics (CFP), City University of Hong Kong, Hong Kong SAR, China

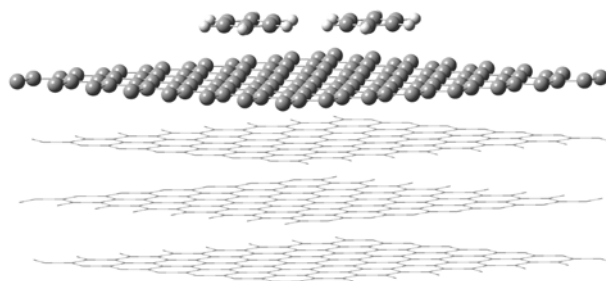

**Figure 1S.** Adsorption models of two benzene molecules on the periodic graphene surfaces of one and four layers in AB stacking.

**Table 1S.** The charge distributions at ionic states of two benzene molecules on the single layer and four-layer graphenes. (Unit: e):

| Structure \ Component | Benzene | Layer 1 | Layer 2 | Layer 3 | Layer 4 |
|-----------------------|---------|---------|---------|---------|---------|
| Gra1+Ben*2            | 0.002   | 0.999   |         |         |         |
| Gra4+Ben*2            | 0.0     | 0.353   | 0.146   | 0.147   | 0.353   |

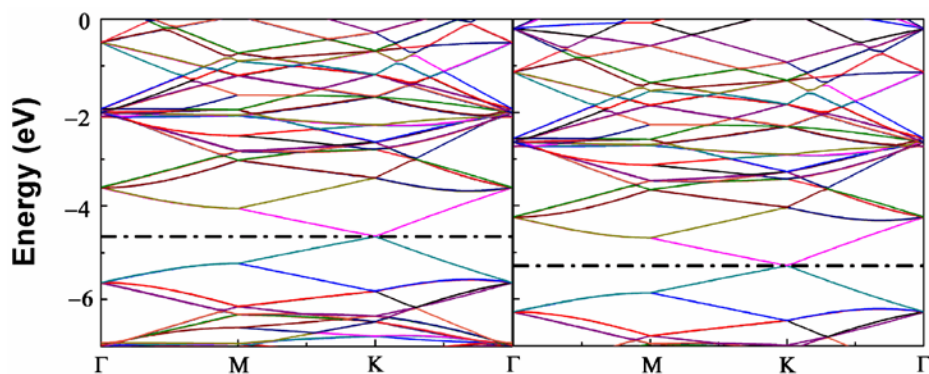

**Figure 2S.** The band structures of neutral and ionic single layer graphene. Left: neutral; right: ionic.

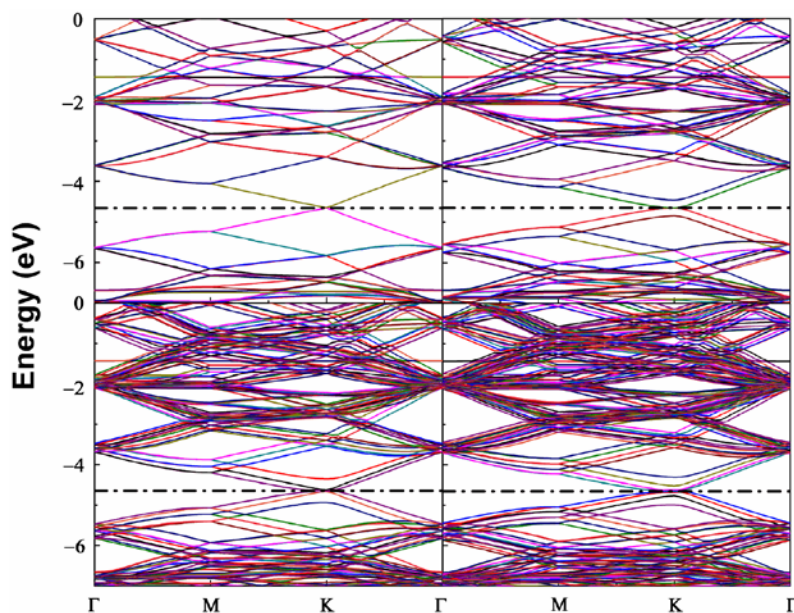

**Figure 3S.** The band structures of four neutral adsorption systems of the benzene molecule adsorbed on multilayer graphenes. Top left: single layer graphene; top right: double layer graphenes; bottom left: three layer graphenes; bottom right: four layer graphenes.
